# Supplementary material for: Parental COVID-19 vaccine hesitancy and vaccine uptake among children and adolescents in the US: Findings from a prospective national cohort
Source: bioRxiv or medRxiv preprint supplement (doi:10.1101/2022.10.16.22281135), 2022-10-17
Supplement: Supplementary file [file media-1.pdf]

Supplementary tables

sTable 1: Univariate regression models for factors associated with vaccination uptake in children

|                                 | <b>16-17 year olds</b><br>(n=358) |                   | <b>12-15 year olds</b><br>(n=599) |                   | <b>5-11 year olds</b><br>(n=679) |                    |
|---------------------------------|-----------------------------------|-------------------|-----------------------------------|-------------------|----------------------------------|--------------------|
| <b>Parental characteristics</b> | OR                                | 95% CI            |                                   |                   | OR                               | 95% CI             |
| <b>Parent vaccinated</b>        | <b>3.81</b>                       | <b>2.52, 6.45</b> | <b>3.88</b>                       | <b>2.81, 5.69</b> | <b>12.12</b>                     | <b>6.66, 26.15</b> |
| <b>Age group</b>                |                                   |                   |                                   |                   |                                  |                    |
| 30-39                           | ref                               | ref               | ref                               | ref               | ref                              | ref                |
| 18-29                           | 1.08                              | 0.77, 1.39        | 1.07                              | 0.85, 1.31        | 0.86                             | 0.67, 1.06         |
| 40-49                           | <b>1.18</b>                       | <b>1.00, 1.42</b> | <b>1.29</b>                       | <b>1.14, 1.46</b> | <b>1.41</b>                      | <b>1.22, 1.61</b>  |
| 50-59                           | <b>1.26</b>                       | <b>1.04, 1.53</b> | <b>1.32</b>                       | <b>1.11, 1.53</b> | 1.1                              | 0.67, 1.52         |
| 60+                             | 1.04                              | 0.64, 1.43        | 1.02                              | 0.62, 1.39        | 1.05                             | 0.62, 1.49         |
| <b>Gender</b>                   |                                   |                   |                                   |                   |                                  |                    |
| Male                            | ref                               | ref               | ref                               | ref               | ref                              | ref                |
| Female                          | 0.98                              | 0.85, 1.14        | 0.93                              | 0.83, 1.04        | <b>0.76</b>                      | <b>0.66, 0.86</b>  |
| Non-binary                      | NA                                | NA                | NA                                | NA                | 1.11                             | 0.60, 1.45         |
|                                 |                                   |                   |                                   |                   |                                  |                    |
| <b>Race/Ethnicity</b>           |                                   |                   |                                   |                   |                                  |                    |
| White                           | ref                               | ref               | ref                               | ref               | ref                              | ref                |
| non-White                       | 0.91                              | 0.80, 1.04        | 0.93                              | 0.83, 1.04        | 0.9                              | 0.78, 1.03         |
|                                 |                                   |                   |                                   |                   |                                  |                    |
| <b>Education</b>                |                                   |                   |                                   |                   |                                  |                    |

|                                          |             |                   |             |                   |             |                   |
|------------------------------------------|-------------|-------------------|-------------|-------------------|-------------|-------------------|
| Less than high school                    | ref         | ref               | ref         | ref               | ref         | ref               |
| High school or higher                    | <b>1.52</b> | <b>1.22, 1.99</b> | <b>1.61</b> | <b>1.34, 1.98</b> | <b>2.27</b> | <b>1.70, 3.21</b> |
|                                          |             |                   |             |                   |             |                   |
| <b>Employment</b>                        |             |                   |             |                   |             |                   |
| Out of work                              | ref         | ref               | ref         | ref               | ref         | ref               |
| Employed                                 | 1.19        | 0.97, 1.56        | 1.2         | 0.98, 1.56        | 1.27        | 0.96, 1.82        |
| Homemaker                                | 1.05        | 0.77, 1.45        | 1.04        | 0.79, 1.40        | 0.74        | 0.49, 1.15        |
| Student                                  | 0.62        | 0.12, 1.34        | 0.62        | 0.17, 1.24        | 1.22        | 0.61, 2.04        |
| Retired                                  | 0.78        | 0.29, 1.37        | 1.13        | 0.70, 1.63        | 1.57        | 0.92, 2.43        |
|                                          |             |                   |             |                   |             |                   |
| <b>Younger sibling in HH</b>             |             |                   |             |                   |             |                   |
| <b>(ref:No)</b>                          | 0.99        | 0.87, 1.14        | 0.93        | 0.84, 1.05        | <b>0.86</b> | <b>0.75, 0.99</b> |
|                                          |             |                   |             |                   |             |                   |
| <b>School attendance status</b>          |             |                   |             |                   |             |                   |
| <b>of children</b>                       |             |                   |             |                   |             |                   |
| All school age children attend in person | ref         | ref               | ref         | ref               | ref         | ref               |
| All school age children attend remotely  | 1.94        | 0.97, 4.12        | <b>1.25</b> | <b>1.09, 1.43</b> | 1.1         | 0.85, 1.25        |
| All children homeschooled                | 0.46        | 0.16, 1.33        | 1           | 0.71, 1.28        | 0.86        | 0.55, 1.20        |
| Attend a hybrid model                    | <b>3.49</b> | <b>1.62, 8.42</b> | <b>1.3</b>  | <b>1.15, 1.48</b> | 1           | 0.78, 1.22        |
|                                          |             |                   |             |                   |             |                   |
|                                          |             |                   |             |                   |             |                   |

|                                                        |      |            |             |                   |             |                   |
|--------------------------------------------------------|------|------------|-------------|-------------------|-------------|-------------------|
| <b>Worry about others getting infected (ref=No)</b>    | 0.99 | 0.87, 1.14 | 1.07        | 0.95, 1.20        | <b>1.38</b> | <b>1.16, 1.67</b> |
|                                                        |      |            |             |                   |             |                   |
| <b>Parent previously infected (ref:No)</b>             | 1.08 | 0.92, 1.24 | 0.92        | 0.80, 1.05        | 1.04        | 0.98, 1.21        |
|                                                        |      |            |             |                   |             |                   |
| <b>Parents know someone who died of COVID (ref:No)</b> | 0.99 | 0.87, 1.14 | <b>1.13</b> | <b>1.01, 1.27</b> | <b>1.18</b> | <b>1.03, 1.36</b> |
|                                                        |      |            |             |                   |             |                   |
| <b>Income loss due to childcare (ref:No)</b>           | 0.87 | 0.69, 1.04 | 0.94        | 0.81, 1.08        | <b>0.79</b> | <b>0.65, 0.95</b> |
